# Supplementary material for: SiC mesoporous membranes for sulfuric acid decomposition at high temperatures in the iodine–sulfur process
Source: Royal Society of Chemistry journal article supplement (doi:10.1039/d0ra06919a), 2020-01-01
Supplement: d0ra06919a1.pdf [file d0ra06919a1.pdf]

## SiC mesoporous membranes for sulfuric acid decomposition at high temperatures in the iodine-sulfur process

### Electronic supplementary information

Xin Yu,<sup>a</sup> Qing Wang,<sup>a</sup> Hiroki Nagasawa,<sup>a</sup> Masakoto Kanezashi,<sup>a</sup> and Toshinori Tsuru<sup>a\*</sup>

<sup>a</sup> Department of Chemical Engineering, Graduate School of Engineering, Hiroshima University, 1-4-1 Kagamiyama, Higashi-Hiroshima 739-8527, Japan

Corresponding author. Department of Chemical Engineering, Graduate School of Engineering, Hiroshima University, 1-4-1 Kagamiyama, Higashi-hiroshima 739-8527, Japan.

*E-mail address:* [tsuru@hiroshima-u.ac.jp](mailto:tsuru@hiroshima-u.ac.jp)

---

#### ESI-1

---

### Hydrothermal and chemical stability test for metal oxide

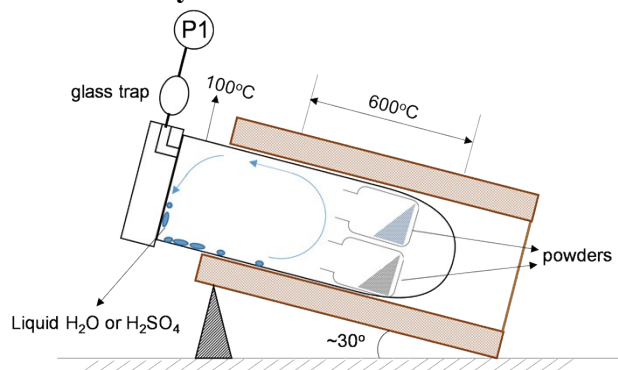

Fig. S1. Schematic diagram of the homemade device for the exposure of powders under H<sub>2</sub>O or H<sub>2</sub>SO<sub>4</sub> vapor. P1 is an automatic exhaust valve used to keep the closed system under a safe pressure of 1 bar. Liquid H<sub>2</sub>O or H<sub>2</sub>SO<sub>4</sub> can follow the cycles: vapor at 600 °C.

---

ESI-2

---

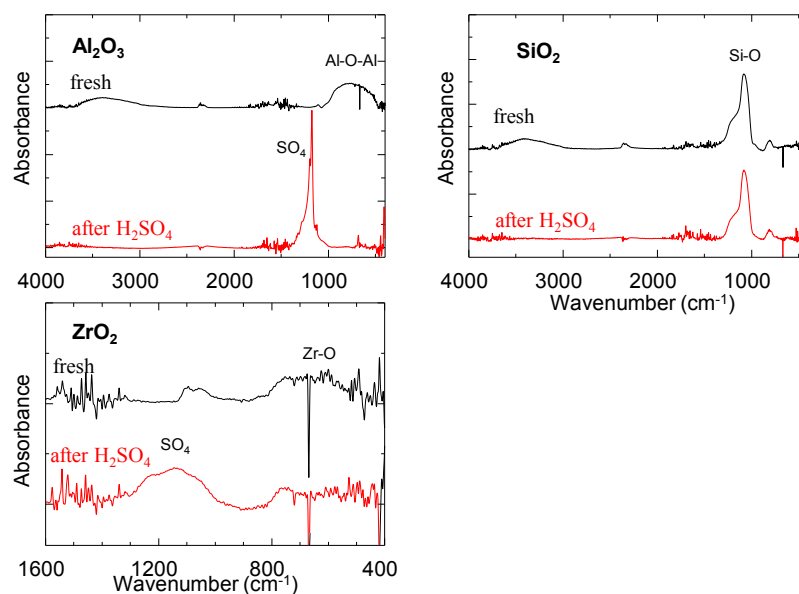

Fig. S2. FTIR spectra of  $\alpha\text{-Al}_2\text{O}_3$ ,  $\text{SiO}_2$  and  $\text{SiO}_2\text{-ZrO}_2$  before and after  $\text{H}_2\text{SO}_4$  exposure at 600 °C were investigated via ATR-FTIR (FT/IR-4100, Jasco, Japan) using an MCT detector cooled with liquid nitrogen. S-O peaks in  $\text{Al}_2\text{O}_3$ , and  $\text{ZrO}_2$  powders are cited from references.<sup>4, 5</sup>

---

ESI-3

---

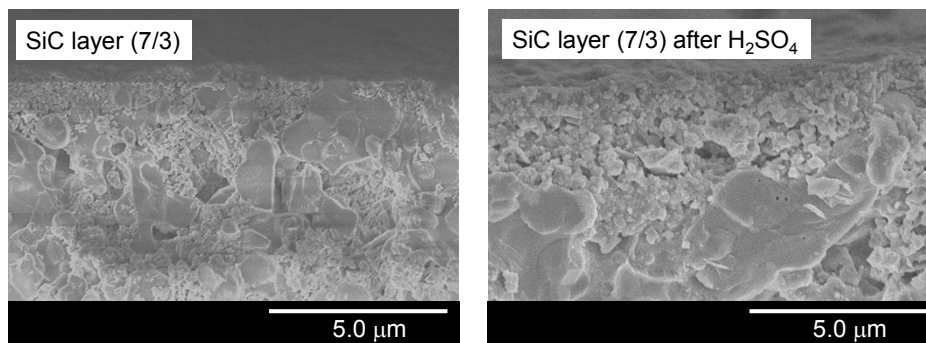

Fig. S3. Cross-section of  $\text{Al}_2\text{O}_3$  layer ( $\text{SiO}_2\text{-ZrO}_2=7/3$ ) and SiC layer ( $\text{SiO}_2\text{-ZrO}_2=7/3$ ) before and after  $\text{H}_2\text{SO}_4$  exposure.

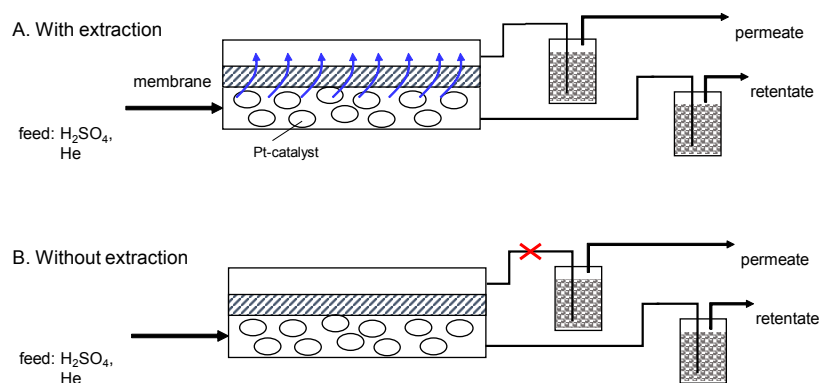

Fig. S4. Flow sheet of the membrane reactors with or without extraction for  $\text{H}_2\text{SO}_4$  decomposition.

#### References.

1. W. Puthai, M. Kanezashi, H. Nagasawa, K. Wakamura, H. Ohnishi, T. Tsuru, *J. Membr. Sci.*, 2016, **497**, 348-356.
2. X. Yu, L. Meng, H. Nagasawa, M. Kanezashi, M. Machida, T. Tsuru, *J. Amer. Cera. Soc.*, 2019, **102**, 6946-6956.
3. J. Zhang, R. Zhang, X. Chen, M. Tong, W. Kang, S. Guo, Y. Zhou, J. Lu, *Ind. Eng. Chem. Res.*, 2014, **53**, 6450-6456.
4. I. J. Dijs, R. de Koning, J. W. Geus, L. W. Jenneskens, *Phys. Chem. Chem. Phys.*, 2001, **3**, 4423-4429.
5. C. R. China, A. Hilonga, M. M. Maguta, S. S. Nyandoro, S. V. Kanth, G. C. Jayakumar, K. N. Njau, *SN Appl. Sciences*, 2019, **1**, 920.
